# Supplementary material for: A physical fitness–evaluation system for outstanding Chinese male boxers
Source: PeerJ. 2024 Apr 24;12:e17271. doi: 10.7717/peerj.17271 (PMC11055509; doi:10.7717/peerj.17271)
Supplement: Supplemental Information 1 [file peerj-12-17271-s001.xlsx]

## Sheet: Lightweight
	Backhand upper arm circumference differential	Finger span - Height	Cottrell index	Pelvic width / shoulder width*100	Relative maximum anaerobic power	Relative VO2max	HRmax	Creatine kinase	Creatine kinase	Cortisol	Medicine ball	30s cumulative punching force	Backhand straight punch force	3-minute cumulative punching force	Backhand straight punch reaction time	Backhand straight punch speed	30-meter sprint	9-minute double shake jump rope	1-minute double shake jump rope	Sitting forward bend
	5.3	3.3	335.29	69.8	13.96	59.68	32.2	104	4.87	792.36	12.25	3.652	547	11.121	0.821	25.3	4.13	756	130	16.03
	5	3.2	323.51	71.28	13.16	59.52	33.8	160	5.05	612.46	12.62	3.124	587	14.129	0.814	24.5	4.27	765	129	17.38
	5.3	2.5	323.86	72.92	14.73	56.59	34.2	176	4.65	654.66	12.22	3.654	532	11.543	0.902	25.3	4.18	746	130	16.57
	4.5	2.4	314.58	71.73	13.14	57.53	34.6	200	5.34	657.43	12.21	3.712	545	12.3	0.785	19.6	4.22	600	129	21.05
	4	2.3	339.29	68.56	13.29	58.5	33.4	169	6.25	568.89	11.2	3.973	694	10.557	0.893	26.1	4.53	650	121	14.13
	5.8	4.1	305.88	70.34	11.41	62.51	34.8	187	5.81	598.56	12.59	3.817	616	11.323	0.841	18.7	4.19	630	155	17.56
	5.7	5	331.4	66.93	12.45	57.52	34.6	226	5.64	607.48	11.5	3.815	543	8.93	0.88	22.4	4.07	601	120	24.47
	4	3.2	329.29	70.4	13.26	61.32	34.8	198	6.54	622.76	11.5	3.08	558	16.88	0.837	19.3	4.56	800	116	21.22
	5.4	1.8	325.34	70.92	12.38	60.47	35	189	4.7	601.81	13.3	3.586	589	13.49	0.902	20.2	4.57	645	116	18.03
	5.9	2.5	327.59	63.83	13.8	58.53	32.8	164	4.45	576.41	12.87	3.677	645	9.399	0.834	20.1	4.56	743	132	17.35
	6.3	3.4	325.16	65.61	12.66	60.31	36	194	5.78	582.65	12.57	3.955	724	11.096	0.809	23.4	4.52	721	130	18.88
	5.7	3.2	339.08	71.2	11.45	60.8	35.2	159	5.26	530.35	12.01	2.744	636	16.691	0.95	22.6	4.16	698	149	15.33
	4.8	3.6	315.15	81.4	10.86	57.77	33.4	172	6.11	756.33	12.38	2.872	601	10.231	0.842	21.3	4.33	713	127	19.33
	5.6	1.4	317.07	66.27	13.26	60.32	34.6	198	4.57	561.71	12.6	2.876	488	10.254	0.856	19.4	4.66	734	110	13.07
	3.1	2.1	302.33	64.21	11.2	60.8	34.8	220	4.76	546.67	9.05	2.653	495	8.765	0.903	19.6	4.7	745	124	15.24
	2.8	3.2	302.33	61.82	10.56	61.32	31.8	272	4.44	620.45	12.5	4.506	533	11.498	0.948	17.3	4.63	670	104	10.51
	5.8	-1.8	315.15	56.38	14.1	56.5	33.4	192	4.31	511.32	9.88	2.84	533	6.939	1.133	19.5	4.59	563	120	14.18
	3.9	3	301.97	64.36	12.14	57.52	33.8	219	4.87	543.65	11	2.223	526	7.614	0.837	18.3	4.34	775	115	15.98
	4.4	2	305.88	65.01	11.69	52.56	34.3	182	4.44	587.45	10.5	2.793	517	8.031	0.852	20.7	4.42	590	150	13.02
	3.8	2	305.88	68.52	13.38	56.22	32.2	234	4.95	470.35	11.1	3.042	522	9.213	0.932	22.3	4.58	626	122	15.76
	3.7	2	305.88	70.65	10.06	60.8	31.3	265	4.99	497.45	11	3.109	533	11.806	0.97	21.6	4.5	528	109	14.23
	3.1	-0.4	305.88	61.57	10.28	54.61	29.2	322	4.86	456.76	9.92	4.151	445	6.295	0.806	17.8	4.75	500	95	8.59
	4.1	2	311.38	71.09	10.15	49.67	30	189	4.52	601.43	8	2.08	525	5.48	0.822	17.6	4.56	463	100	16.89
	3.9	-1.3	310.45	66.75	9.03	54.21	31.8	232	5.44	576.87	10.34	2.941	492	6.525	0.852	19.1	4.67	637	112	12.02
	5	1	300.6	62.96	11.22	56.79	33.8	187	4.43	592.54	9.9	3.132	624	9.245	0.922	21.5	4.98	565	109	17.45
	2	4	285.71	68.19	12.29	56.5	35.2	193	3.25	548.65	13.8	3.442	629	10.931	0.844	18.7	4.6	639	113	9.33
	3.8	2	329.48	62.47	13.04	57.47	33.8	191	3.85	532.27	12.7	3.78	560	8.232	0.921	19.8	4.3	559	115	12.45
	3.1	-0.7	323.86	62.94	11.05	59.52	34	204	4.87	511.34	11.5	2.724	573	6.206	0.844	19.3	4.7	508	115	18.05
	2.9	1.1	324.42	58.77	9.19	58.5	34.2	234	5.23	489.98	12.1	3.07	527	12.787	0.904	20.3	4.23	513	120	8.89
	2.6	2.1	325.9	58.96	11.34	53.37	31.8	224	4.76	548.1	12.3	4.988	575	10.266	0.858	18.8	4.42	600	129	13.11
	3.4	2	298.85	71.93	9.53	54.56	34	199	4.64	562.34	10.5	4.712	610	7.162	0.912	19.2	4.45	453	95	15.45
	3.9	0.7	327.59	64.16	9.69	53.34	34.8	187	4.43	565.34	10.35	3.1	562	10.741	0.837	19.6	4.57	589	118	8.3
	4.6	2	326.65	67.91	9.59	50.87	34	173	4.53	684.54	10.49	3.022	526	10.654	0.988	24.5	4.62	475	120	15.2
	3.2	3.2	334.9	63.34	12.04	56.5	33.6	223	4.98	598.45	11	2.987	616	9.132	0.988	20.3	4.12	600	84	6.55
	5.3	0.6	334.51	66.93	12.89	59.53	34.2	203	4.65	604.45	9.15	2.987	634	9.879	1.203	19.4	4.56	666	106	16.56
	2.7	1.1	320.04	69.29	8.96	54.21	31.8	266	5.87	522.65	11.3	3.592	576	7.092	0.866	18.6	4.48	600	116	17.44
	3.5	2.1	304.09	64.93	9.51	55.42	29.8	232	5.01	587.66	11.7	4.487	556	8.33	0.923	18.1	4.25	543	105	17.82
	2.9	4.1	326.46	64.22	11.32	59.547	33	221	4.08	598.56	11.2	3.035	532	7.299	0.847	20.3	4.41	715	109	12.77
	4.2	4.2	280.64	63.38	11.05	60.58	31.8	187	4.54	600.43	12.3	4.087	578	9.375	0.918	19.2	4.12	532	125	9.35
	2.7	5	334.31	65.01	9.34	56.32	31.2	167	4.33	643.76	11.7	3.134	576	8.515	0.823	18.4	4.48	693	115	21.67
	3.3	2.3	323.5	68.75	9.89	48.22	31.8	177	4.05	548.63	9.8	3.376	576	8.895	0.932	19.3	4.67	755	111	12.33

## Sheet: Middleweight
	Backhand upper arm circumference differential	Finger span - Height	Cottrell index	Pelvic width / shoulder width*100	Relative maximum anaerobic power	Relative VO2max	HRmax	Creatine kinase	Creatine kinase	Cortisol	Medicine ball	30s cumulative punching force	Backhand straight punch force	3-minute cumulative punching force	Backhand straight punch reaction time	Backhand straight punch speed	30-meter sprint	9-minute double shake jump rope	1-minute double shake jump rope	Sitting forward bend
	4.4	3.5	372.56	70.81	13.03	61.78	33.6	198	4.87	923.65	14.1	3.038	750	10.239	0.798	20.3	4.47	130	813	15.02
	4.6	3.3	411.41	67.59	13.11	59.72	34.8	210	4.87	645.67	12.34	3.165	721	10.354	0.751	19.7	4.28	125	850	14.48
	3.7	3.7	360.62	72.45	11.14	56.08	35	181	4.98	687.34	14.6	2.575	568	9.191	0.869	21.3	4.32	121	831	25.76
	3.5	2.4	389.61	58.77	12.43	59.52	34.2	185	4.9	678.73	13.5	5.122	670	11.581	0.876	19.6	4.2	115	791	22.34
	5.2	2.1	389.39	69.27	12.97	58.88	35.2	187	5.4	781.66	14.1	4.13	623	10.438	0.902	20.3	4.27	110	588	18.55
	2.8	4	397.69	74.93	13.3	59.52	33.6	148	5.52	817.72	13.2	4.601	772	12.695	0.876	19.7	4.08	130	529	17.25
	6.2	6	378.5	58.9	11.05	56.42	35	189	5.08	723.45	12.3	4.167	756	11.285	0.903	23.5	4.1	113	756	19.2
	4.7	2.4	387.42	76.13	12.16	58.5	34.2	231	5.28	698.21	14.57	3.072	664	9.793	0.865	27.1	4.37	111	721	15.55
	4.8	3.4	420.88	71.39	11.36	61.88	33	254	6.04	649	11.17	3.721	778	15.864	0.854	23.3	4.01	109	665	17.15
	4.5	9.1	400.86	71.19	11.37	62.58	32.4	233	5.54	643.34	14.1	3.774	742	11.525	0.898	21.6	4.05	120	583	13.22
	4	4	413.68	71.29	11.15	61.23	34.6	219	6.03	657.45	14.5	3.327	695	8.915	0.846	20.4	3.98	105	700	9.3
	6.1	4.2	416.67	67.88	13.65	58.47	33.6	182	5.29	558	13.45	3.954	720	11.674	0.911	25.3	4.38	140	632	16.13
	5.3	3.5	420.88	72.07	12.51	60.8	33	204	5.44	649.77	14.45	3.423	764	11.794	1.004	23.3	4.14	115	598	18.18
	5.5	2.1	423.73	68.82	11.76	59.42	33.2	235	4.62	786	12.34	3.472	656	14.675	0.805	24.5	4.29	140	556	19.16
	6.6	3.3	383.97	71.94	13	56.51	30.4	114	5.64	776.2	14.2	4.012	695	11.834	0.895	25.2	4.15	140	628	18.24
	7.1	3.4	391.38	78.05	12.48	56.13	33.6	202	5.63	623.65	13.55	4.442	703	11.543	0.922	26.1	4.48	131	534	17.46
	6.8	3.1	403.27	64.35	13.03	58.5	33	174	4.47	801.66	13.22	3.943	780	11.453	0.913	26.3	4.38	135	587	19.34
	4.9	3.4	395.26	71.1	12.93	58.88	35.4	139	3.34	705.43	13.66	3.668	730	9.343	0.857	23.2	4.39	136	550	18.78
	6.7	2.6	420.88	71.33	13.01	57.64	33.8	200	4.98	663.67	13.13	3.643	743	11.337	0.921	23.2	4.24	137	641	23.62
	5.9	4.5	387.21	70.69	12.03	59.51	33	216	4.78	635.45	14.2	3.721	676	11.602	0.948	22.3	4.33	125	556	17.75
	5	-0.7	331.86	69.52	13.03	59.52	30.4	207	5.32	679.65	12.67	3.238	754	10.439	0.868	23.3	4.17	129	612	21.55
	4.8	4	366.28	70.78	13.05	59.48	33.4	207	5.54	634	12.22	3.568	750	10.221	0.935	20.4	4.33	127	564	17.3
	4	9.2	411.41	72.06	13.22	60.16	34.6	213	5.12	904.38	14.24	2.902	787	11.342	1.248	24.5	4.52	132	602	11.32
	5.4	2.7	367.41	70.92	12.39	56.5	31.4	198	5.24	652.34	12.89	3.876	732	12.55	0.834	19.2	4.28	132	520	19.38
	4.4	0	387.64	72.7	12.1	59.66	35	206	5.42	648.44	13.55	4.022	712	11.221	0.985	21.3	4.51	95	600	21.03
	5.3	2.5	360	68.16	11.01	55.11	33.6	197	6.14	808.43	12.7	3.575	668	10.191	0.969	22.4	4.32	116	579	21.47
	4.6	6	349.42	70.4	11.72	60.02	32.2	184	4.45	765.56	12	4.122	690	11.681	0.926	21.2	4.31	105	572	23.55
	5.2	3.3	353.54	68.52	10.54	56.43	35	219	5.76	608.32	13.46	4.321	734	11.853	0.896	22.3	4.24	110	562	17.45
	5.3	2.2	392.27	65.11	13.18	54.32	32.6	198	5.45	437.6	11.45	2.968	716	16.054	0.858	19.4	4.18	123	518	15.1
	6	4	381	67.51	13.12	51.65	34.2	257	5.63	661.57	13.6	3.394	552	9.906	0.929	19.7	4.47	114	605	15.9
	3.1	3.2	387.21	72.22	10.67	52.84	34.8	189	6.29	607.7	14	3.954	773	13.674	0.81	23.5	4.46	118	679	20.22
	5	3.5	425.65	72.77	9.91	63.13	34.6	223	5.25	634.06	15.3	2.872	634	10.555	0.703	21.1	4.28	107	689	35.78
	7.1	2.4	415.97	70.25	11.2	60.81	35	118	5.19	708.59	14.2	2.246	736	13.045	0.703	19.8	4.52	100	562	16.88
	6.5	2.1	416.67	78.45	9.95	56.77	34.4	197	4.62	685.16	12.3	4.271	741	10.234	0.843	23.2	4.29	111	500	8.12
	4	2	414.36	80.87	10.23	54.13	35	189	5.12	665.43	12.38	4.802	686	10.97	0.912	21.4	4.47	115	658	14.56
	3.2	2.1	342.86	72.47	8.81	58.79	32.2	203	4.98	653.55	12.1	4.235	623	8.588	0.873	20.4	4.36	113	551	12.24
	3.1	-0.5	329.67	71.73	12.64	59.51	33	227	4.54	623.45	12.6	3.157	584	8.345	1.167	18.6	4.65	108	550	14.88
	4.6	1.1	372.34	65.54	8.34	60.8	34.8	237	4.54	734.45	10.5	2.518	712	7.437	0.888	19.5	4.55	112	639	13.12
	6.5	-1.4	342.47	60.05	10.99	56.5	34	197	4.34	788.45	8.4	3.254	598	6.363	1.043	20.5	4.57	93	525	8.58
	3.5	3.3	353.73	72.15	11.72	52.81	31.2	260	4.87	734.4	15.1	2.867	624	8.429	0.982	20.4	5.01	123	616	21.72
	5.9	2.4	338.41	716.39	13.3	54.9	32.2	198	4.65	605.78	12.56	2.915	605	10.353	0.982	22.3	4.61	123	497	23.31
	3.3	5.1	356.54	68.69	8.38	58.5	34	206	3.31	665.56	11.15	4.186	675	7.557	0.815	18.3	4.74	98	594	13.98
	4.3	3.2	350	63.53	10.82	58.6	33.6	236	4.43	623.56	12.8	2.879	669	10.983	0.887	17.8	4.28	112	646	6.45
	2.8	2.2	345.96	63.79	8.29	56.5	34.8	199	4.55	711.23	10.3	4.108	644	12.456	0.961	18.7	4.44	110	621	13.55
	3.4	3.1	370.59	63.53	13.13	56.5	32.2	221	5.04	551.45	11.8	5.321	788	6.343	0.933	19.5	4.58	79	487	23.5
	4.3	1.8	360.62	57.24	12.54	58.77	29	243	5.64	598.56	11.87	3.165	721	10.354	1.024	18.4	4.51	123	850	11.55
	3.9	2.2	335.38	67.51	12.42	58.5	33.2	254	5.87	558.98	12.67	4.363	705	10.086	0.894	24.6	4.38	125	571	15.95
	5	3	360.21	65.19	8.67	52.07	28	354	6.63	436.87	11	3.723	576	10.086	0.902	26.3	4.6	98	554	32.88
	3.4	3	355.93	68.32	7.67	53.27	33.8	210	4.76	467.68	11.9	2.63	611	8.133	1.028	24.6	5.07	123	522	15.12
	4.7	2.5	383.76	66.75	8.47	51.36	35	194	4.31	588.28	11.56	2.583	667	7.324	0.79	19	4.6	111	532	15.5
	3.9	4	348.23	83.91	8.17	53.81	32.4	231	4.87	499.21	14.2	3.571	516	12.003	0.847	16.8	4.17	105	465	17.35
	4.9	3	387.64	60.69	8.96	61.52	34.6	254	4.57	553.56	11.9	4.012	605	11.989	0.885	17.5	4.72	108	477	7.55
	3.7	1.5	357.55	78.21	8.73	53.53	30	223	4.99	420.04	13.5	5.152	579	14.839	0.883	19.5	4.42	115	528	7.6
	2.6	1.2	401.16	65.43	11.7	56.02	33	234	5.53	589.45	11.7	4.052	703	9.356	0.981	19.5	4.43	107	662	15.38
	5.3	3	382.27	67.05	13.06	61.04	31.8	188	4.76	701.23	11.4	4.143	695	13.011	0.891	19.5	4.1	115	582	13.52
	3.9	3.3	385.04	67.96	8.96	54.46	34	232	5.12	596.34	11.4	2.123	777	12.971	0.868	18.5	4.26	115	500	18.1
	3.9	2	380.37	72.91	7.47	53.28	35	265	4.82	523.65	12.2	3.997	598	6.928	1.035	19.3	4.73	116	512	14.22
	6.6	3.2	398.38	71.3	12.5	58.5	31.2	189	5.05	723.34	11.1	3.658	656	15.011	1.058	23.4	4.27	98	423	7.58
	4.5	4	430.05	66.58	12.67	54.1	33	276	5.43	577.78	11.3	3.225	653	10.31	1.024	19.5	4.5	106	421	13.13
	5.1	0.7	358.97	63.88	8.41	47.52	32.2	178	4.47	654.08	12.8	4.39	566	9.975	1.029	20.1	4.45	98	511	13.37
	4.3	2	380.27	65.97	7.9	55.21	32	201	3.33	449.04	10.7	4.691	734	11.979	0.877	20.2	4.43	86	465	6.76
	3.1	1.3	404.97	58.31	11.2	55.62	33.2	225	4.77	636.65	12.6	3.939	545	11.09	0.923	20.1	4.27	81	490	22.2
	4.5	1.2	404.97	63.8	8.25	52.04	32.2	194	4.67	657.76	12.1	2.225	580	7.364	0.774	18.1	4.42	105	566	15.55
	4.8	2.2	349.61	75.93	10.64	58	34.4	243	4.79	558.87	9.85	4.124	756	11.054	0.844	20.5	4.12	111	736	9.6
	2.4	0.8	397.46	65.51	12.7	59.53	34	197	4.48	679.56	13.4	5.002	709	11.023	1.007	18.9	5.06	130	499	14.5
	4.9	4.1	358.97	64.78	11.18	51.07	32.2	215	5.21	612.45	13.23	2.994	648	8.884	0.955	20.2	4.56	137	623	15.65
	3.7	2.9	428.08	71.39	9.12	60.51	31.2	243	5.43	566.67	13.9	4.206	771	9.345	0.906	19.5	4.46	121	564	12.38
	3.5	3.1	357.75	69.96	8.98	58.5	33	199	5.03	645.23	14.2	2.633	687	8.993	0.916	22.1	4.4	80	500	17.22

## Sheet: Heavyweight
	Backhand upper arm circumference differential	Finger span - Height	Cottrell index	Pelvic width / shoulder width*100	Relative maximum anaerobic power	Relative VO2max	HRmax	Creatine kinase	Creatine kinase	Cortisol	Medicine ball	30s cumulative punching force	Backhand straight punch force	3-minute cumulative punching force	Backhand straight punch reaction time	Backhand straight punch speed	30-meter sprint	9-minute double shake jump rope	1-minute double shake jump rope	Sitting forward bend
	6.3	5.7	453.27	74.54	9.5	53.31	32.8	198	4.65	567.77	14.68	4.268	740	12.466	0.852	20.4	4.35	100	545	23.41
	4.8	5.9	528.15	72.33	12.4	56.38	33.8	196	5.18	531.87	14.4	5.169	897	14.523	0.849	21.5	4.12	104	576	11.37
	6.2	6.8	442.14	81.25	8.95	59.68	35	189	5.44	599.03	14.45	3.032	728	15.228	0.887	20.2	4.29	120	875	15.09
	5.5	10.2	449.5	79.1	12.86	54.28	32.4	137	5.66	768.43	17.1	3.875	837	18.415	0.897	21.4	4.11	119	520	16.23
	5.5	6.1	442.38	78.4	9.19	54.22	35	215	4.85	540.19	16.54	4.233	822	11.435	0.876	23.4	4.25	123	754	18.9
	5.4	6.8	438.31	78.85	10.09	52.32	33.8	234	5.12	523.76	14.55	3.876	765	12.032	0.932	20.3	4.34	117	587	23.96
	5.5	3.2	475.69	73.37	10.19	53.02	33.2	197	4.45	597.67	14.1	3.732	797	14.951	0.855	21.3	4.36	65	600	20
	4	6.4	491.63	68.17	12.46	51.46	32.6	234	5.57	629.86	13.4	5.291	776	11.075	0.917	19.4	4.37	89	624	18.04
	4.8	5.3	502.48	77.5	11.52	56.52	33.4	189	4.54	598.76	13.65	5.231	778	13.354	0.847	20.1	4.34	132	557	21.5
	4.9	3.7	489.77	79.95	10.44	57.78	34.2	237	3.8	664.58	14.4	4.132	754	11.424	0.955	19.8	4.63	118	578	22.33
	5.7	6.1	496.72	87.23	12.68	51.12	32.8	197	4.62	634.93	14.34	3.734	765	11.145	0.916	19.8	4.28	120	588	25.5
	6.1	7.1	437.6	79.35	8.68	56.51	30.2	255	4.38	607.43	15.5	4.125	789	12.324	0.952	23.4	4.37	120	515	23.51
	5.7	7.8	493.49	77.7	10.93	52.77	29.2	187	5.72	694.71	14.88	3.785	812	11.435	1.021	18.7	4.32	100	553	20.4
	6	7.3	499.45	78.63	9.17	54.22	33.8	220	5.13	406.49	13.87	3.478	824	11.534	1.021	19.9	4.6	103	563	15.69
	5.9	4	545.99	73.61	9.45	54.11	28.2	234	5.6	558.89	14.5	3.043	946	13.109	0.894	25.6	4.37	70	498	22.88
	5.9	4.9	563.99	79.91	11.64	46.71	30	233	5.6	634.76	13.56	5.863	956	16.56	0.951	19.7	4.65	99	463	12.5
	4.7	2.8	537.19	79.28	10.5	44.55	28.2	212	5.12	703.44	13.9	4.564	809	14.543	0.941	18.9	4.34	104	502	9.17
	6.5	6.7	557	80.19	11.98	52.12	33.2	196	3.97	565.34	15.2	4.421	822	13.012	0.913	19.5	4.38	128	557	21.5
	5.4	4.8	548.23	74.53	12.2	49.12	31.8	243	5.47	498.78	14.9	4.123	865	12.956	0.953	17.2	4.54	104	554	23.41
	5.1	2.8	429.48	70.83	11.26	52.31	32.4	188	4.98	596.78	11.7	4.268	740	12.466	0.952	23.4	4.34	97	581	21.02
	5.9	4.6	490.3	71.46	12.57	51.87	31.4	194	4.25	576.34	15.6	3.141	661	8.857	0.99	23.3	4.27	72	550	15.09
	4.4	6.6	489.77	78.47	12.41	50.67	32.4	125	5.97	905.43	15.3	5.928	922	12.543	0.881	21.3	4.32	118	498	10.9
	5.6	5.7	484.82	77.2	10.47	50.12	29.2	339	5.57	529.02	13.4	3.29	929	14.234	0.866	21.6	4.66	76	655	9.5
	5.4	6.2	493.76	79.49	9.81	51.12	32	245	5.23	511.65	11.3	3.073	630	9.211	0.953	22.3	4.38	102	539	18.67
	5.5	7.1	478.95	77.51	9.55	51.11	29.2	208	4.88	563.76	14.2	4.546	765	10.987	0.946	20.2	4.66	110	490	26.33
	5.5	7.3	493.61	75.28	9.08	60.36	30	214	3.8	498.78	14.3	3.104	809	16.953	1.105	21.2	4.63	100	508	19.04
	5.7	3.9	570.34	73.08	8.92	44.77	26.8	266	5.34	578.67	15.4	3.594	770	10.577	0.859	21.2	4.98	85	550	17
	6.6	3.1	621.05	66.1	9.59	43.44	29.2	207	4.65	576.98	14.7	3.723	989	8.126	0.998	18.3	4.65	76	604	24.96
	3.9	2.9	434.55	66.03	10.32	45.23	29	226	4.12	604.43	12.8	3.231	646	9.38	0.936	19.4	4.63	98	500	30.23
	4.3	3.8	424.75	77.49	8.17	48	31.6	223	4.98	531.78	15	3.112	747	9.482	1.025	18.3	4.56	101	566	23.57
	4	2.2	442.38	72.06	10.01	49.76	28.4	294	5.12	422	11.3	2.804	615	7.844	1.022	17.8	4.67	91	425	8.5
	3.6	0.2	425.64	69.27	8.83	43.73	29.2	288	4.56	451.99	13.6	5.279	656	8.599	0.954	19.4	5.15	113	432	28.27
	4	3.3	418.32	67.53	7.77	50.1	27.2	201	5.12	252.93	10.9	6.078	571	10.934	1.071	20.3	4.64	98	548	14.22
	4	2.3	434.55	64.95	7.74	48.32	28.8	249	5.22	542.78	13.82	3.432	624	10.154	1.012	19.4	4.37	111	423	9.11
	4.2	3.3	455.57	69.9	11.82	51.32	31.2	242	5.32	500.67	13.25	2.515	758	11.214	0.917	17.9	4.69	95	454	10.4
	4	5.7	443.84	74.55	12.17	52.78	26.4	342	4.67	506.04	13.25	3.063	641	6.595	0.893	19.5	4.88	106	460	9.05
	5.4	4.3	437.37	67.82	7.23	50.1	27.2	189	4.54	554.98	11	3.602	615	12.169	0.903	20.4	4.68	80	556	13.16
	4.7	0.8	439.98	68.48	6.75	44.88	31.4	245	4.98	526.56	14.4	4.056	736	12.065	0.94	19.3	5.05	95	551	15.05
	5.3	4.8	495.37	77.94	7.8	52.71	32.2	263	5.77	479.87	12.4	4.343	798	11.964	0.961	19.3	4.75	92	559	22.4
	2.6	4.7	449.5	79.49	10.84	53.69	32.4	243	5.34	498.45	13.1	3.453	803	10.876	1.211	19.6	4.68	89	470	34.56
